# Supplementary material for: A retrospective observational study of medical incident command and decision-making in the 2011 Oslo bombing
Source: Springer Nature journal article supplement (doi:10.1186/s12245-015-0052-9), 2015-03-03
Supplement: MOESM1 [file 9735736]

## **Interview guide**

Establish an incident timeline for the informant

- narrative
- critical moments or turns of events

Situational assessment

- changes
- cues
- previous experience

Anticipated development of events

- others'
- own
- changes in anticipation

Distribution of resources

- frame or directions
- explicit orders
- own initiative

Tasks

- frame or directions
- explicit orders
- own initiative

Organizational structure

- frame or directions
- explicit orders
- own initiative
